# Supplementary material for: New insight into rare-earth doped gadolinium molybdate nanophosphor assisted broad spectral converters from UV to NIR for silicon solar cells
Source: Royal Society of Chemistry journal article supplement (doi:10.1039/c4ra15383a), 2015-01-01
Supplement: c4ra15383a1.pdf [file c4ra15383a1.pdf]

## Supporting Information

### **New insight into rare-earth doped gadolinium molybdate nanophosphor assisted broad spectral converter from UV to NIR for silicon solar cell**

**Pawan Kumar<sup>a, b</sup> and Bipin Kumar Gupta<sup>a, \*</sup>**

<sup>a</sup>CSIR - National Physical Laboratory, Dr K S Krishnan Road, New Delhi, 110012, India

<sup>b</sup>Academy of Scientific and Innovative Research (AcSIR), CSIR –National Physical Laboratory,  
New Delhi – 110012, India

\* Corresponding author. Tel.: +91-11-45609385, Fx: +91-11-45609310

E-mail address: [bipinbhu@yahoo.com](mailto:bipinbhu@yahoo.com)

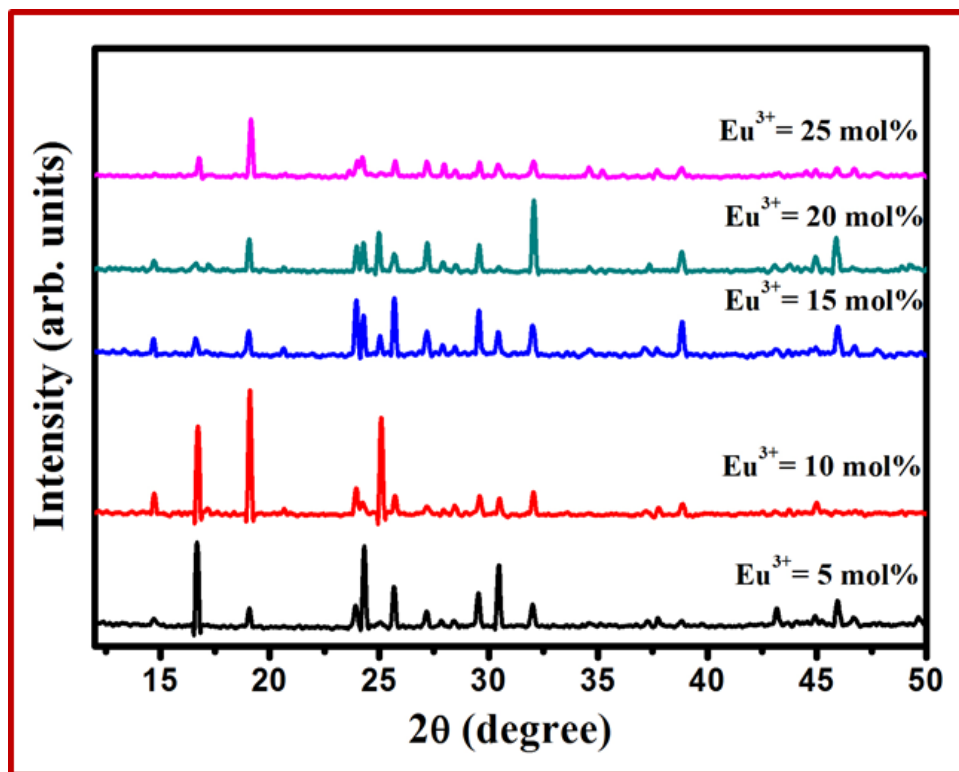

**Fig. S1:** The XRD patterns of  $Gd_{2-x}(MoO_4)_3:Eu_x^{3+}$  downshift nanophosphor at different concentration ( $x=0.1$  to  $0.5$ ).

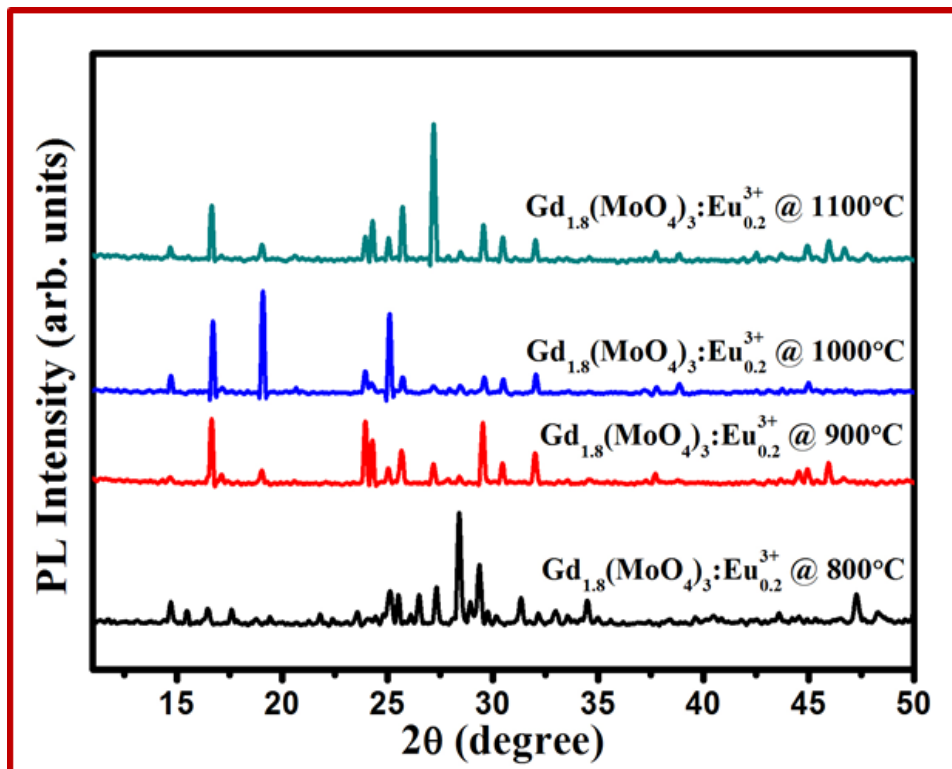

**Fig. S2:** The XRD patterns of  $\text{Gd}_{1.8}(\text{MoO}_4)_3:\text{Eu}_{0.2}^{3+}$  downshift nanophosphor at different sintering temperatures (800 to 1100°C).

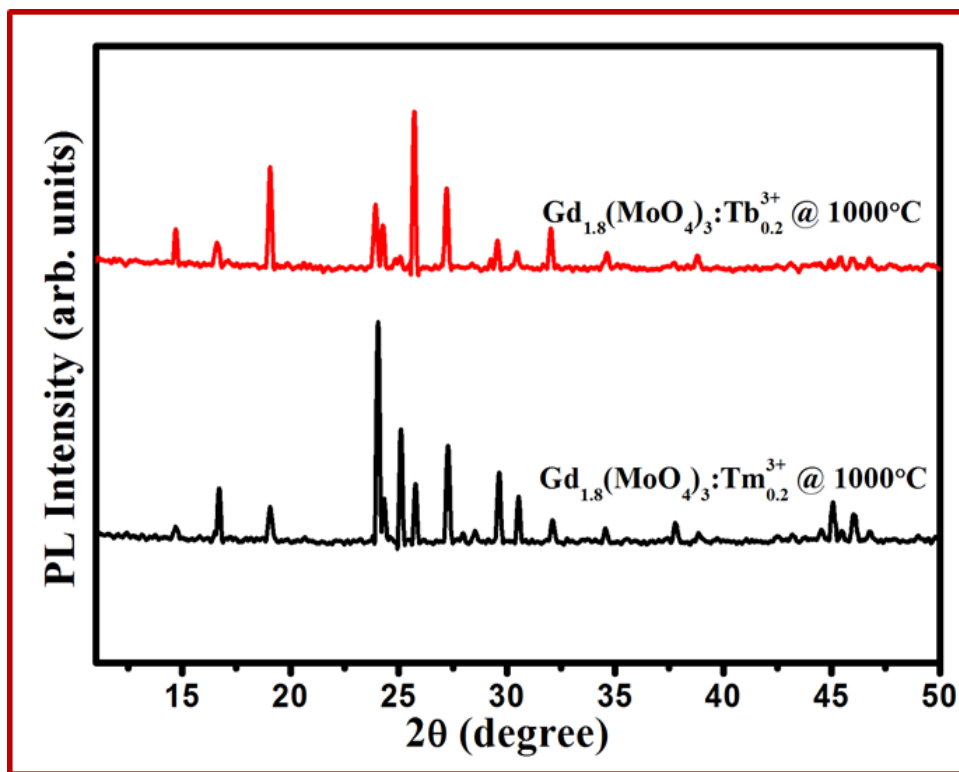

**Fig. S3:** The XRD patterns of  $\text{Gd}_{1.8}(\text{MoO}_4)_3:\text{Tb}_{0.2}^{3+}$  and  $\text{Gd}_{1.8}(\text{MoO}_4)_3:\text{Tm}_{0.2}^{3+}$  downshift nanophosphors at 1000 °C sintering temperature.

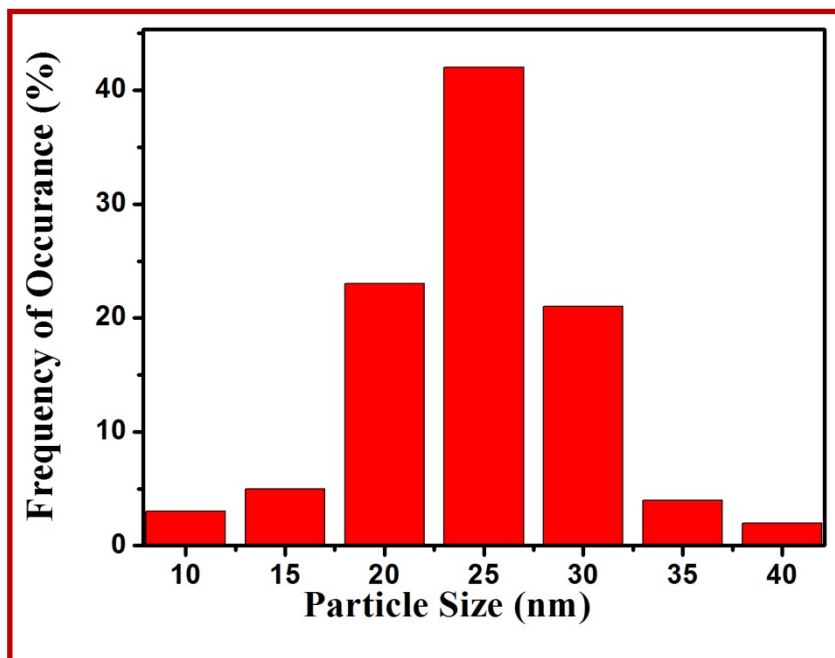

**Fig. S4:** The statistic histogram for size distribution of  $\text{Gd}_{1.8}(\text{MoO}_4)_3:\text{Eu}_{0.2}^{3+}$  downshift nanophosphor.

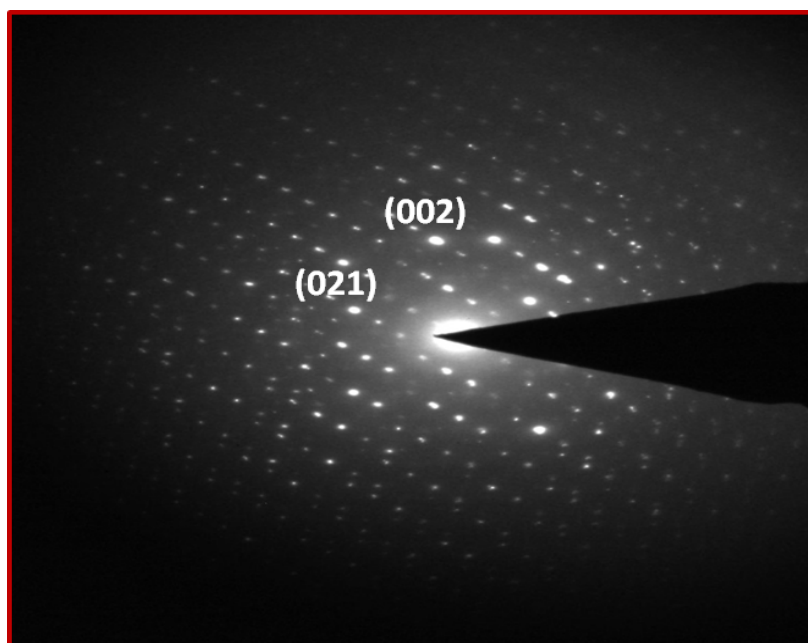

**Fig. S5:** The SAED pattern of  $\text{Gd}_{1.8}(\text{MoO}_4)_3:\text{Eu}_{0.2}^{3+}$  downshift nanophosphor.

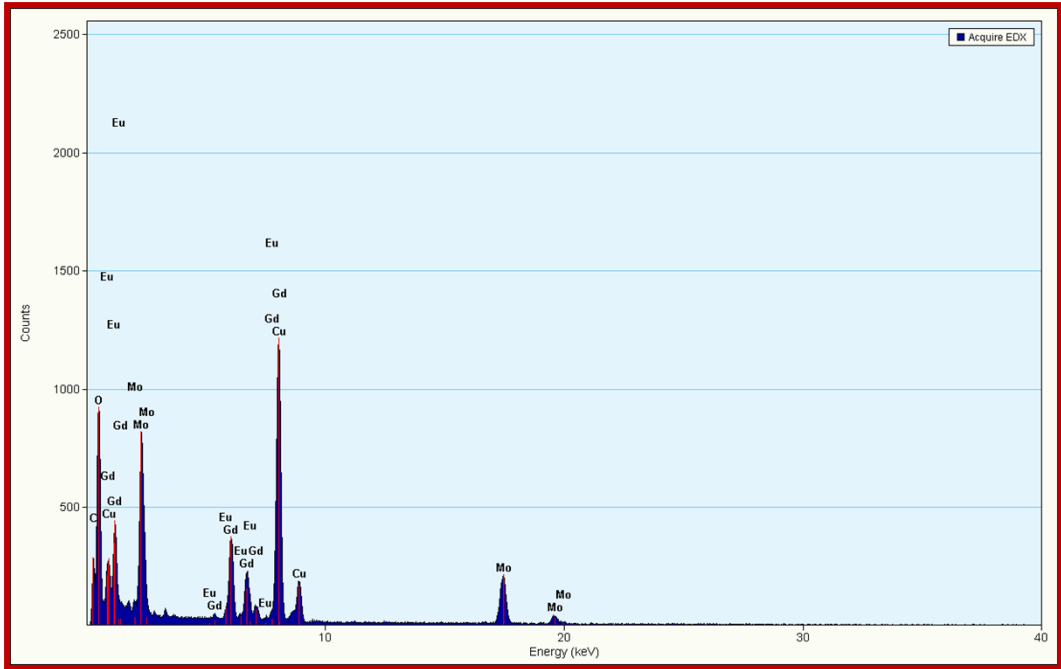

**Fig. S6:** The EDAX spectrum of Gd<sub>1.8</sub>(MoO<sub>4</sub>)<sub>3</sub>:Eu<sub>0.2</sub><sup>3+</sup> downshift nanophosphor.

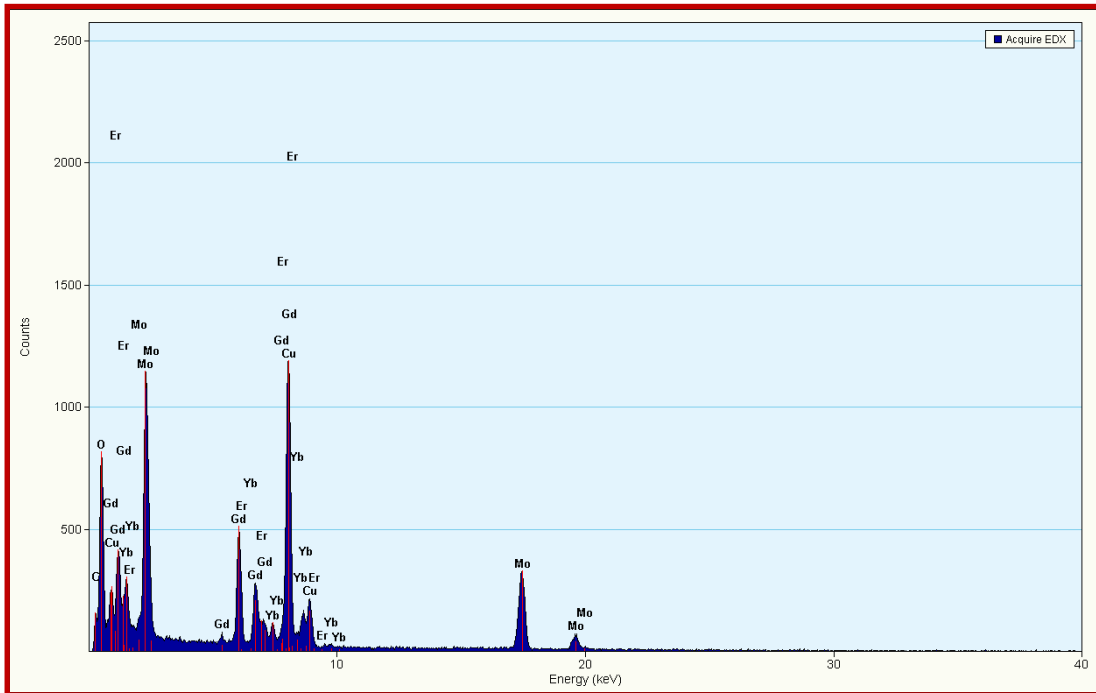

**Fig. S7:** The EDAX spectrum of Gd<sub>2</sub>(MoO<sub>4</sub>)<sub>3</sub>:Er<sup>3+</sup>/Yb<sup>3+</sup> upconversion nanophosphor.

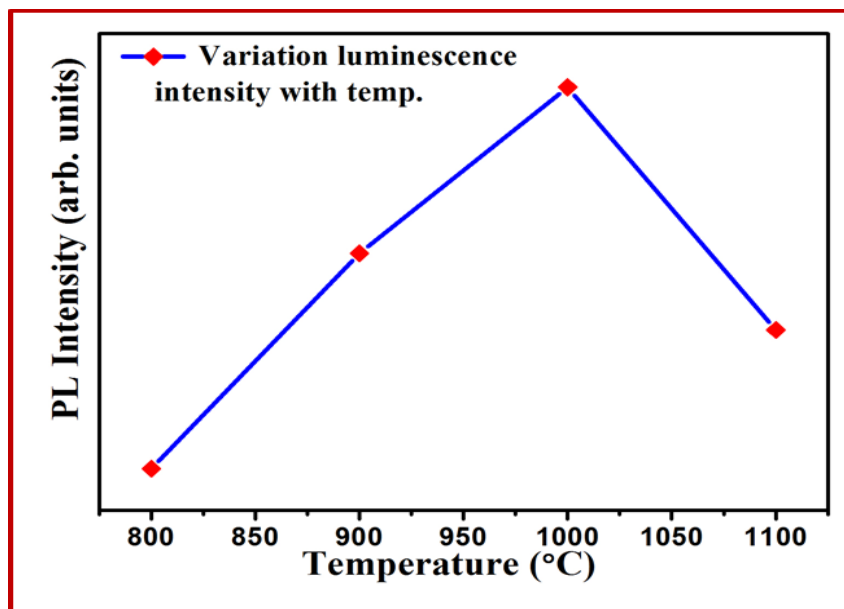

**Fig. S8:** The variation in PL emission intensity of  $Gd_{1.8}(MoO_4)_3:Eu_{0.2}^{3+}$  downshift nanophosphor at different sintering temperature (800 to 1100°C).

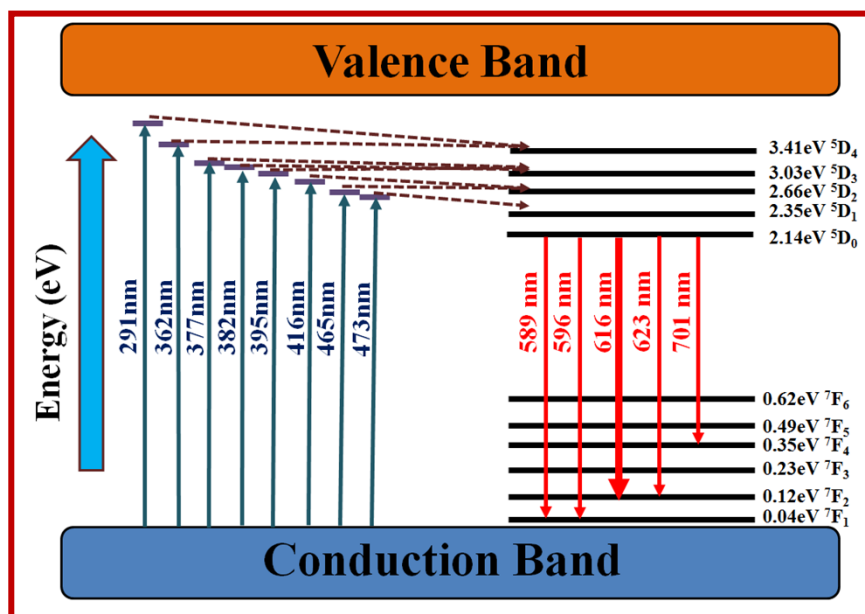

**Fig. S9:** The energy level diagram for downshift process in  $Gd_{1.8}(MoO_4)_3:Eu_{0.2}^{3+}$  nanophosphor.

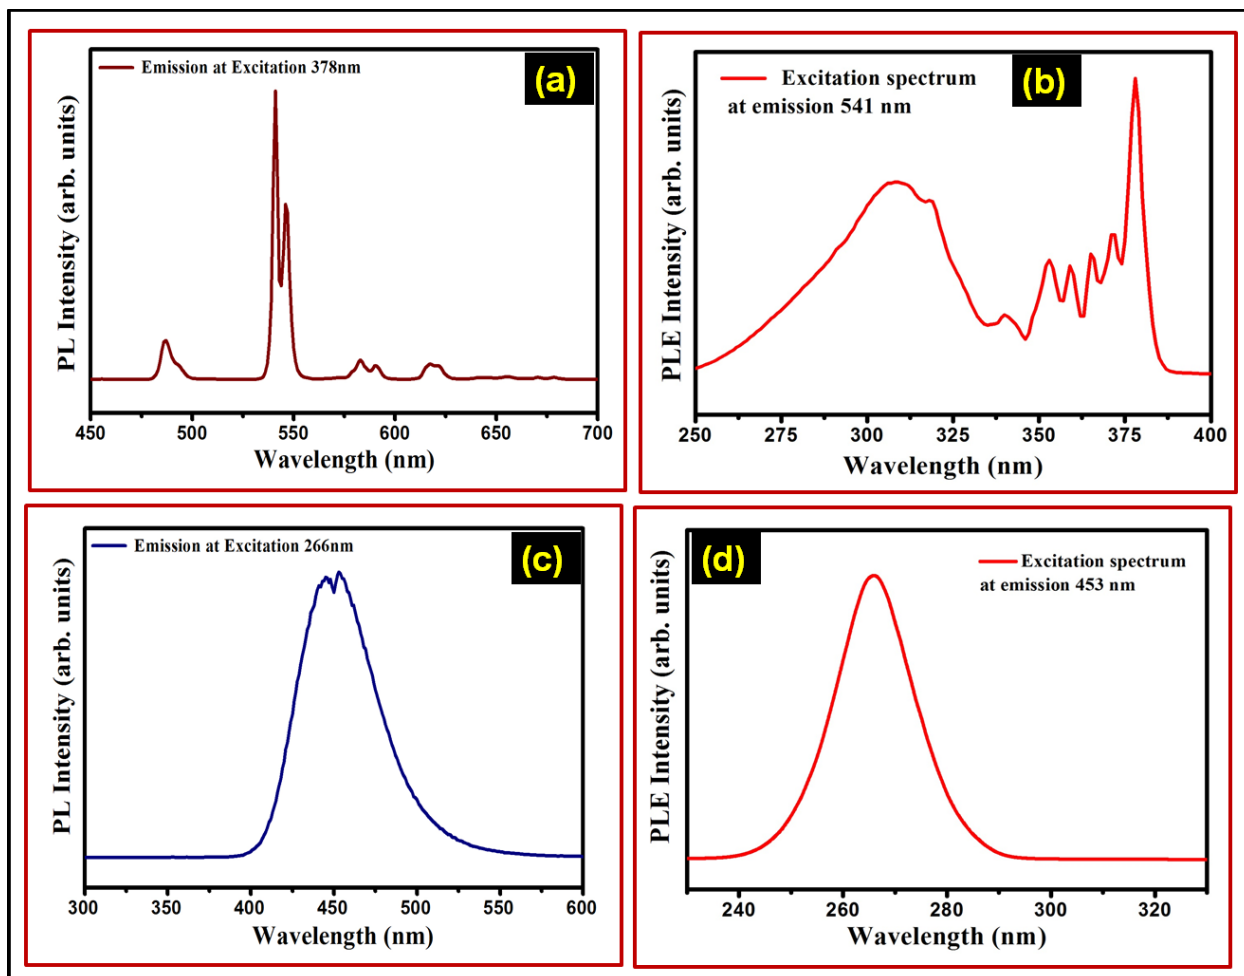

**Fig. S10:** (a) emission spectrum of  $\text{Gd}_{1.8}(\text{MoO}_4)_3:\text{Tb}_{0.2}^{3+}$  downshift nanophosphor, (b) excitation spectrum of  $\text{Gd}_{1.8}(\text{MoO}_4)_3:\text{Tb}_{0.2}^{3+}$  downshift nanophosphor at 541 nm emission wavelength, (c) emission spectrum of  $\text{Gd}_{1.8}(\text{MoO}_4)_3:\text{Tm}_{0.2}^{3+}$  downshift nanophosphor and (d) The excitation spectrum of  $\text{Gd}_{1.8}(\text{MoO}_4)_3:\text{Tm}_{0.2}^{3+}$  downshift nanophosphor at 453 nm emission wavelength.

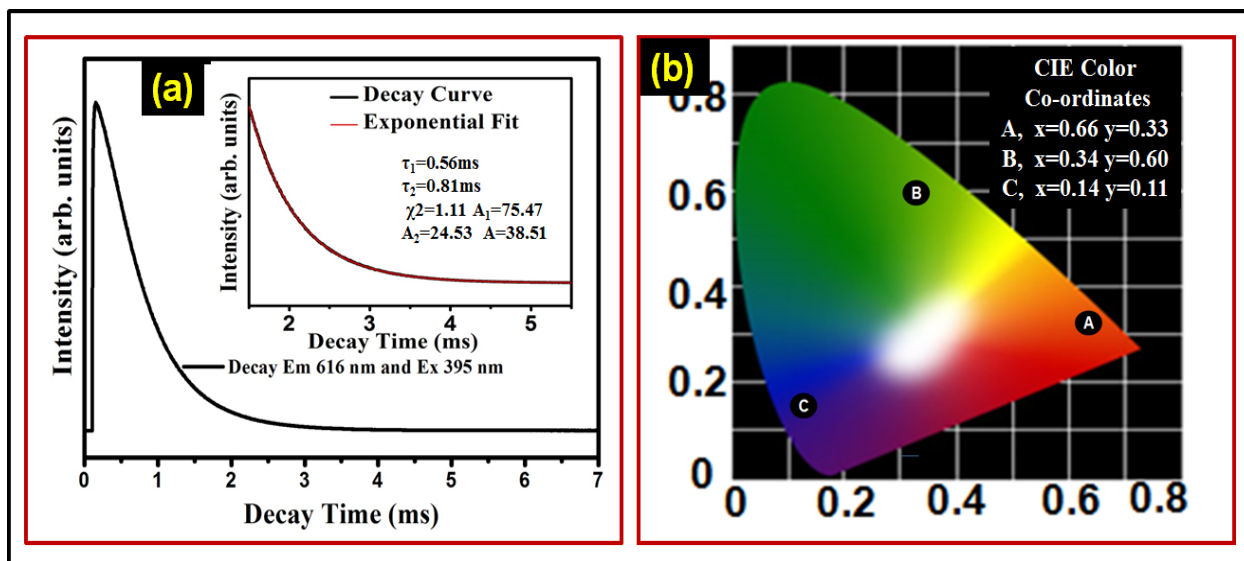

**Fig. S11:** (a) The time resolved PL decay profile of  $\text{Gd}_{1.8}(\text{MoO}_4)_3:\text{Eu}_{0.2}^{3+}$  downshift nanophosphor recorded at room temperature while monitoring the emission at 616 nm at 395 nm excitation wavelength and inset shows the exponential fitting of decay profile which gives the lifetime data and the generated parameters after exponential fitting and (b) the CIE colour co-ordinates of  $\text{Gd}_{1.8}(\text{MoO}_4)_3:\text{Eu}_{0.2}^{3+}$ ,  $\text{Gd}_{1.8}(\text{MoO}_4)_3:\text{Tb}_{0.2}^{3+}$  and  $\text{Gd}_{1.8}(\text{MoO}_4)_3:\text{Tm}_{0.2}^{3+}$  downshift nanophosphors.



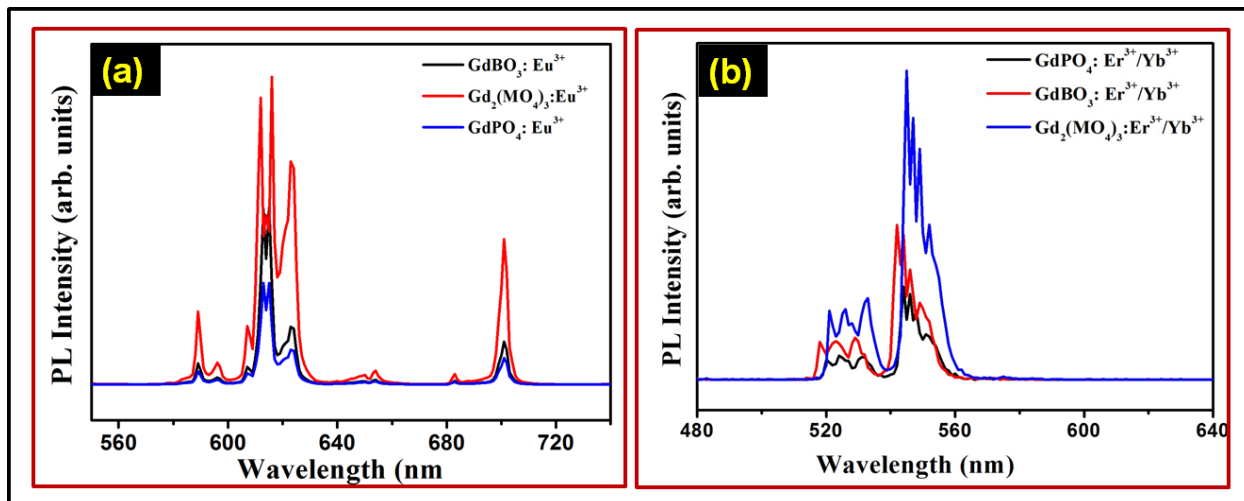

**Fig. S12:** (a) emission spectra of Gd<sub>2</sub>(MO<sub>4</sub>)<sub>3</sub>:Eu<sup>3+</sup>, GdPO<sub>4</sub>:Eu<sup>3+</sup> and GdBO<sub>3</sub>:Eu<sup>3+</sup> downshift nanophosphors at excitation wavelength 395 nm and (b) emission spectra of Gd<sub>2</sub>(MO<sub>4</sub>)<sub>3</sub>:Er<sup>3+</sup>/Yb<sup>3+</sup>, GdPO<sub>4</sub>:Er<sup>3+</sup>/Yb<sup>3+</sup> and GdBO<sub>3</sub>:Er<sup>3+</sup>/Yb<sup>3+</sup> upconversion nanophosphors at excitation wavelength 980 nm.

| $Gd_{2-x}(MoO_4)_3 \cdot Eu_x^{3+}$<br>$x = (0.1 \text{ to } 0.5)$ | Lattice Parameter<br><b>a</b> (Å) | Lattice<br>Parameter<br><b>b</b> (Å) | Lattice<br>Parameter<br><b>c</b> (Å) | Cell Volume<br>(Å) <sup>3</sup>       |
|--------------------------------------------------------------------|-----------------------------------|--------------------------------------|--------------------------------------|---------------------------------------|
| JCPDS Standard<br>card no.20-0408                                  | 10.38                             | 10.41                                | 10.69                                | 1155.1195                             |
| $Gd_{1.9}(MoO_4)_3 \cdot Eu_{0.1}^{3+}$                            | $10.2131 \pm 0.0019$              | $10.1143 \pm 0.0041$                 | $10.632 \pm 0.0053$                  | $1098.2681 \pm 0.4129 \times 10^{-7}$ |
| $Gd_{1.8}(MoO_4)_3 \cdot Eu_{0.2}^{3+}$                            | $10.1631 \pm 0.0054$              | $10.1132 \pm 0.0021$                 | $10.740 \pm 0.0027$                  | $1103.873 \pm 0.3062 \times 10^{-7}$  |
| $Gd_{1.7}(MoO_4)_3 \cdot Eu_{0.3}^{3+}$                            | $10.1532 \pm 0.0032$              | $10.0921 \pm 0.0024$                 | $10.701 \pm 0.0028$                  | $1096.5005 \pm 0.2150 \times 10^{-7}$ |
| $Gd_{1.6}(MoO_4)_3 \cdot Eu_{0.4}^{3+}$                            | $10.1326 \pm 0.0026$              | $10.0824 \pm 0.0017$                 | $10.643 \pm 0.0032$                  | $1087.4712 \pm 0.1414 \times 10^{-7}$ |
| $Gd_{1.5}(MoO_4)_3 \cdot Eu_{0.5}^{3+}$                            | $10.0982 \pm 0.0023$              | $10.0745 \pm 0.0029$                 | $10.598 \pm 0.0035$                  | $1078.1803 \pm 0.2334 \times 10^{-7}$ |

**Table S1:** Least squares refined unit cell parameters and cell volume for variants of  $Gd_{2-x}(MoO_4)_3 \cdot Eu_x^{3+}$  downshift nanophosphor ( $x = 0.1$  to  $0.5$ ).
